# Supplementary material
Source: Springer Nature journal article supplement (https://www.springermedizin.de/resource/supplementary/13041_2013_215_MOESM6_ESM.pdf/25657760)

A

AAC: CA1 pyramidal blade area / CA1 area

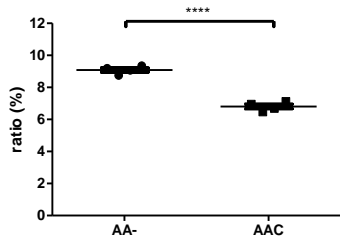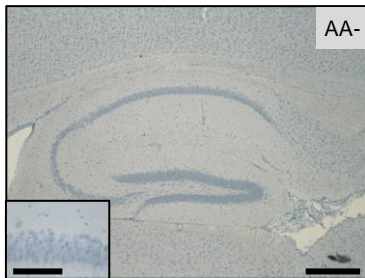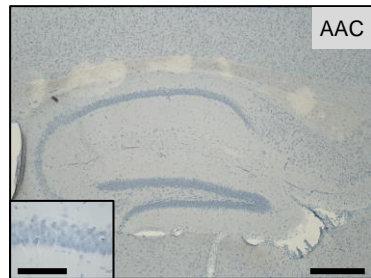

B

GSK3 $\alpha$ .KO: CA1 pyramidal blade area / CA1 area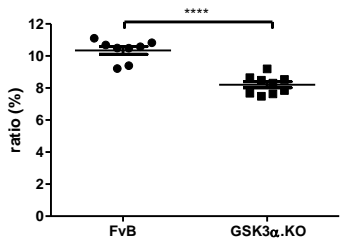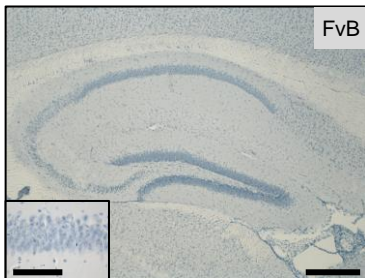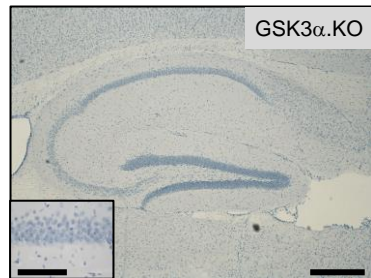

Supplement: MOESM6 [file 25657760]
